# Supplementary material for: Intralesional administration of VAX014 facilitates in situ immunization and potentiates immune checkpoint blockade in immunologically cold tumors
Source: PubMed Central journal article supplement — J Immunother Cancer. 2023 Jun 8;11(6):e006749. doi: 10.1136/jitc-2023-006749 (PMC10254596; doi:10.1136/jitc-2023-006749), 2023-06-08

## Supplemental Figure S1

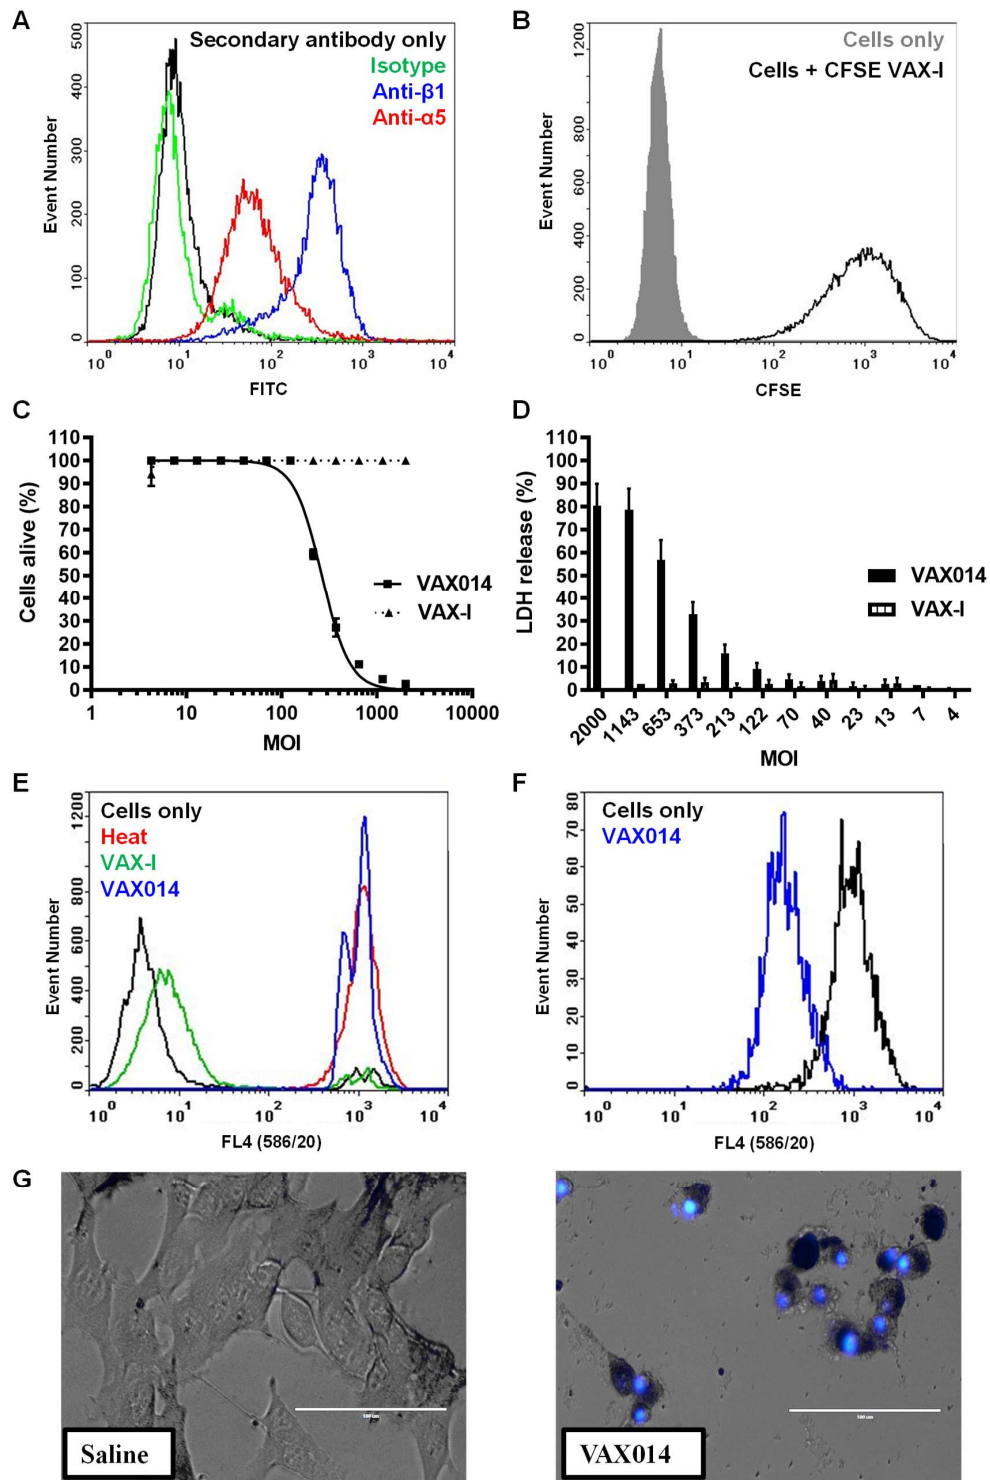

**Supplemental Figure S2**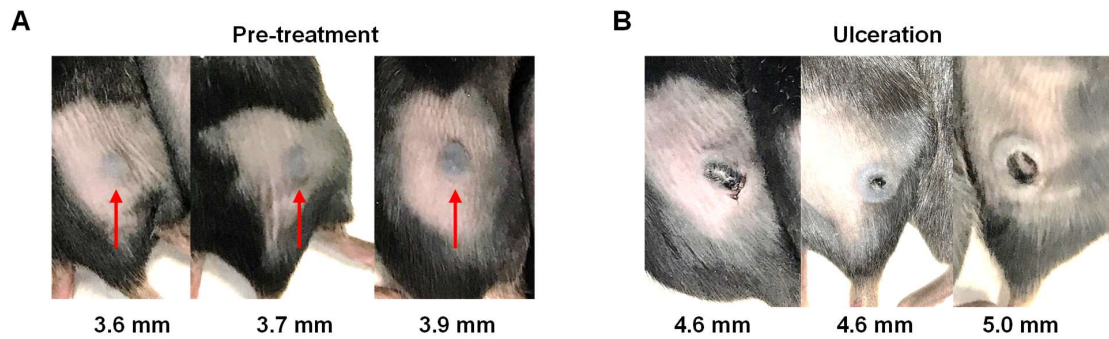

Supplemental Figure S3

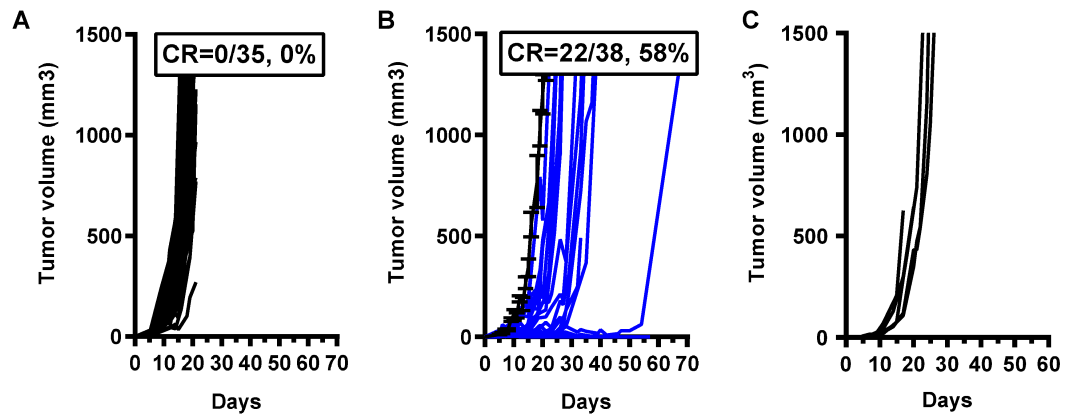

Supplemental Figure S4

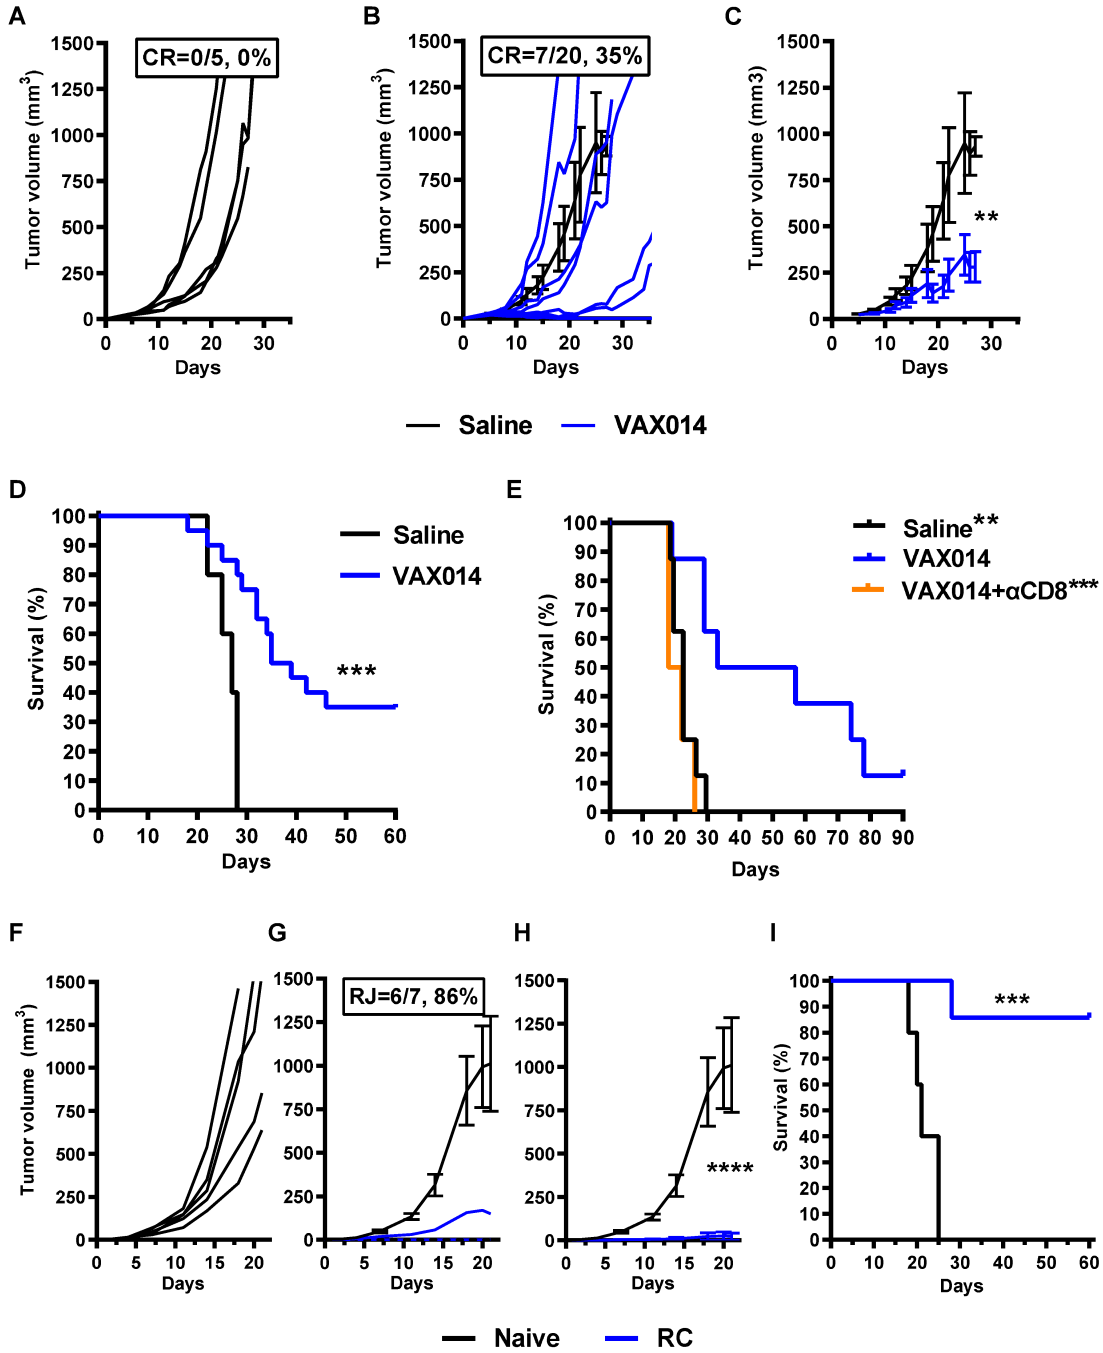

**Supplemental Figure S5**

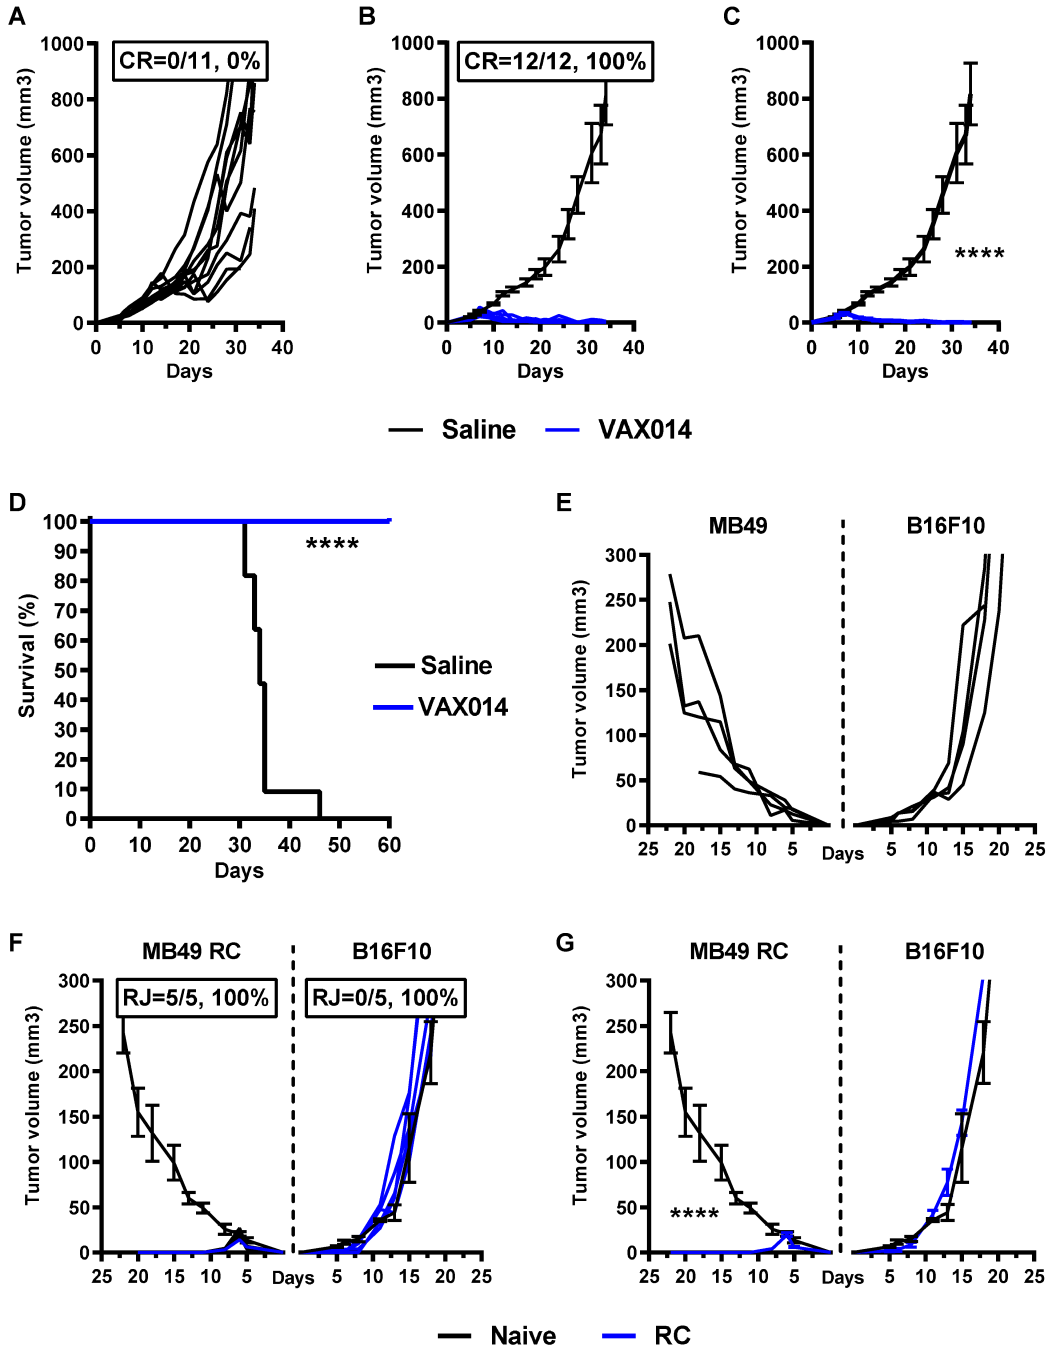

## Supplemental Figure S6

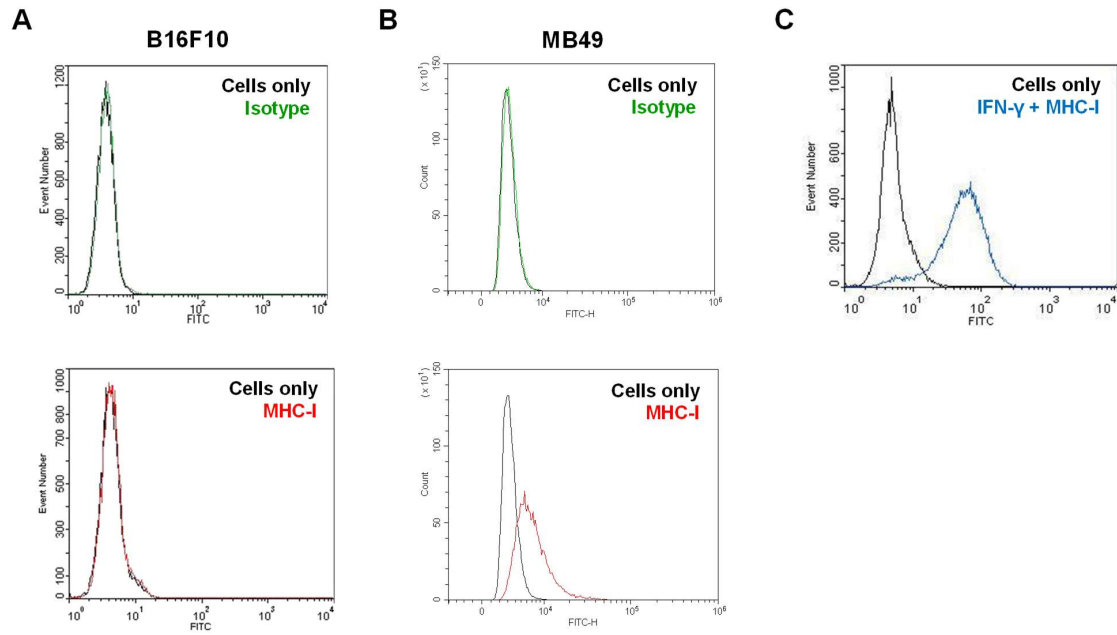

## Supplemental Figure S7

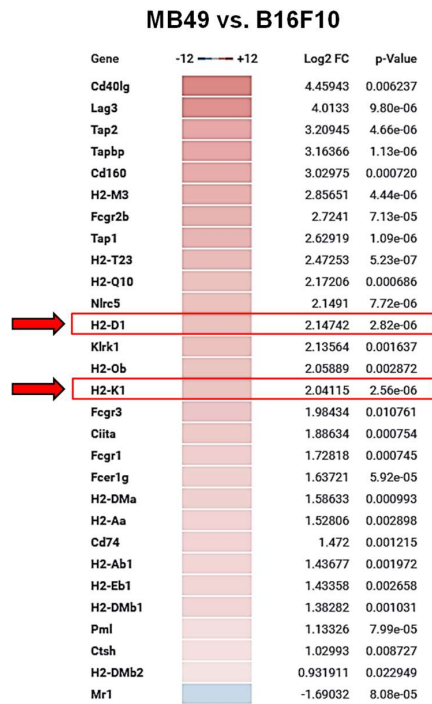

Supplemental Figure S8

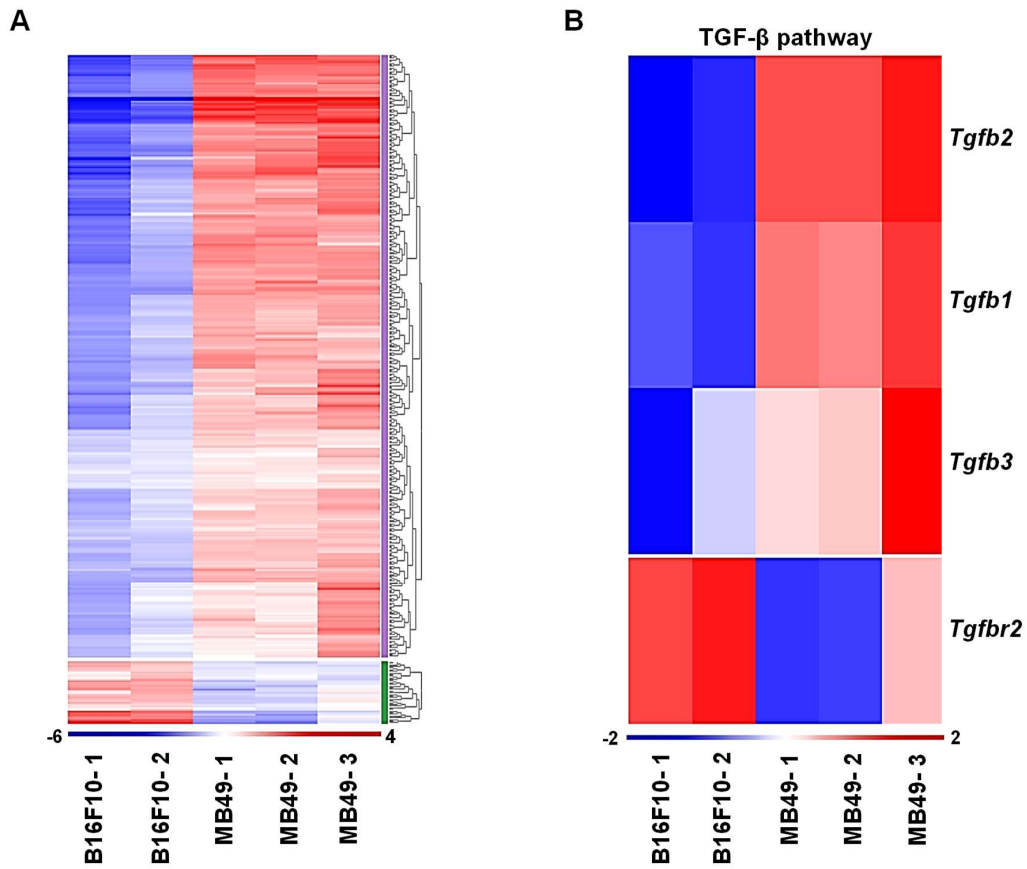



**Supplemental Figure S9**

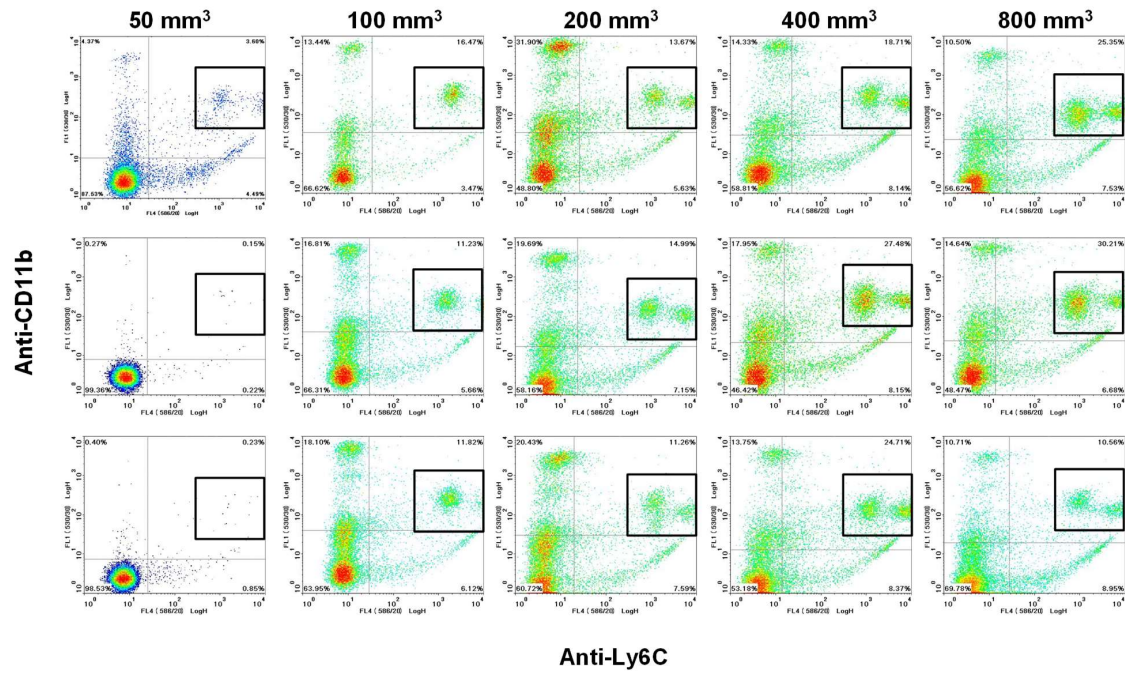

**Supplemental Figure S10**

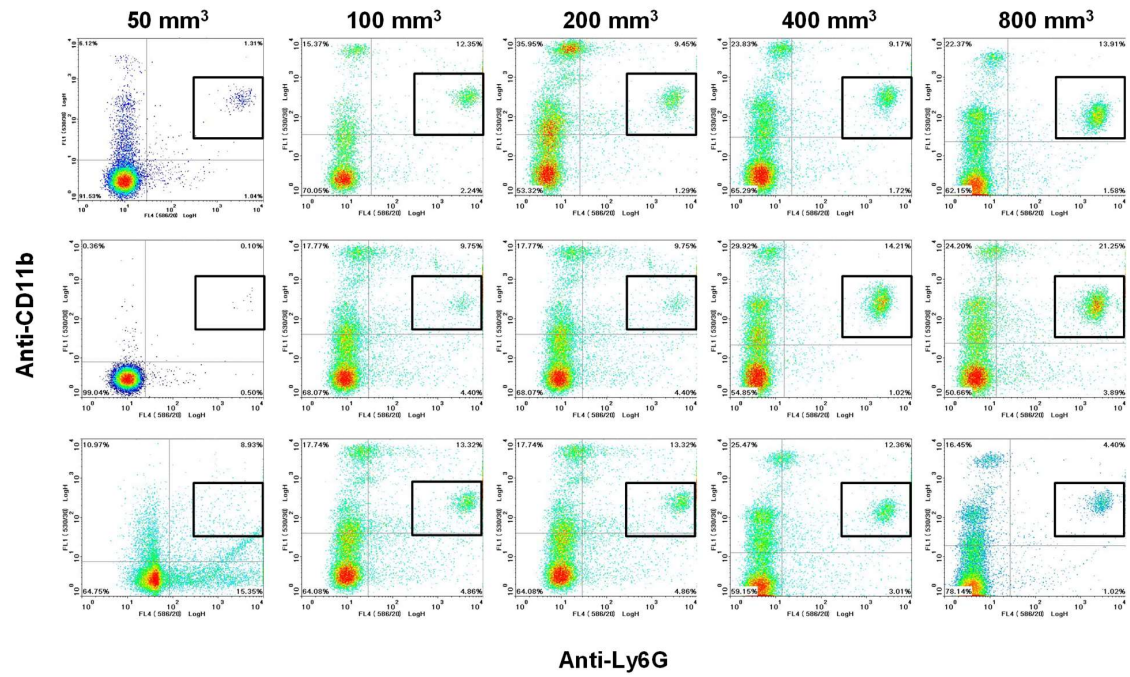

Supplemental Figure S11

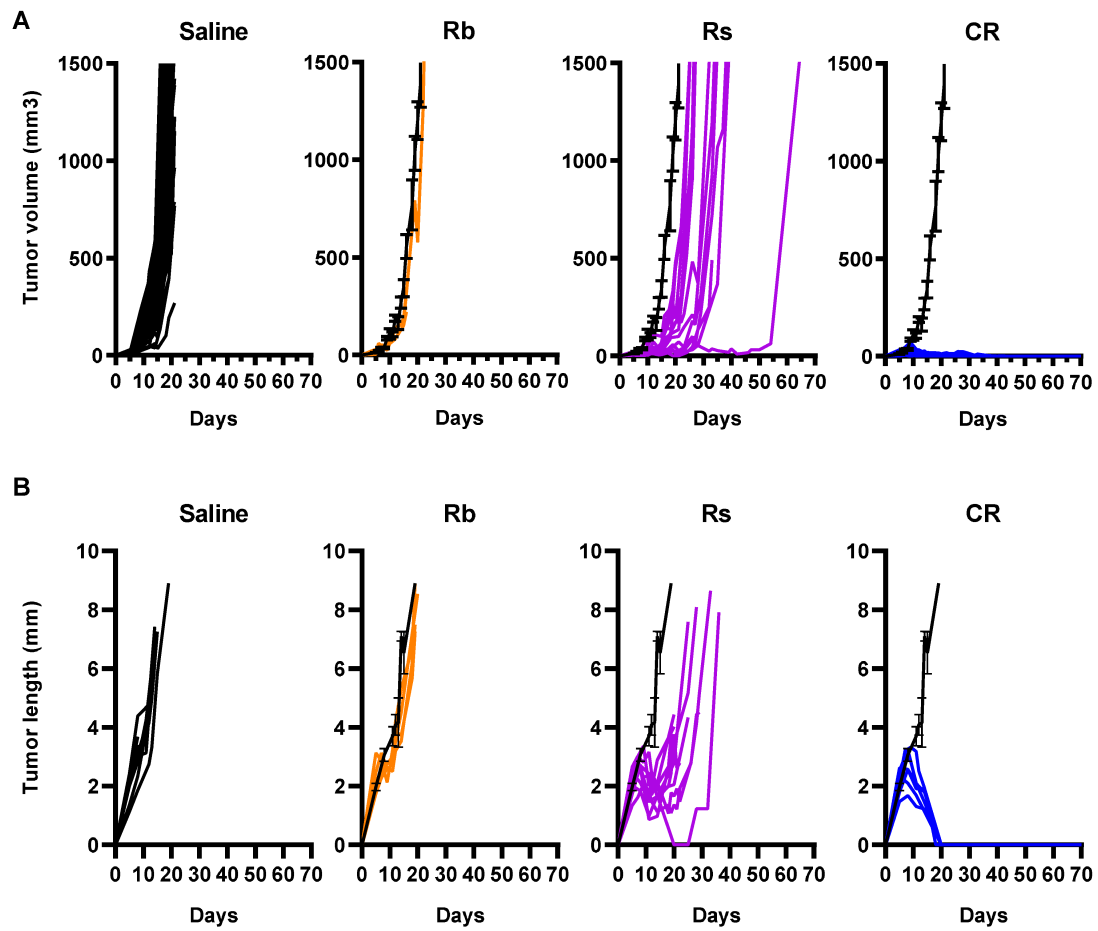

Supplemental Figure S12

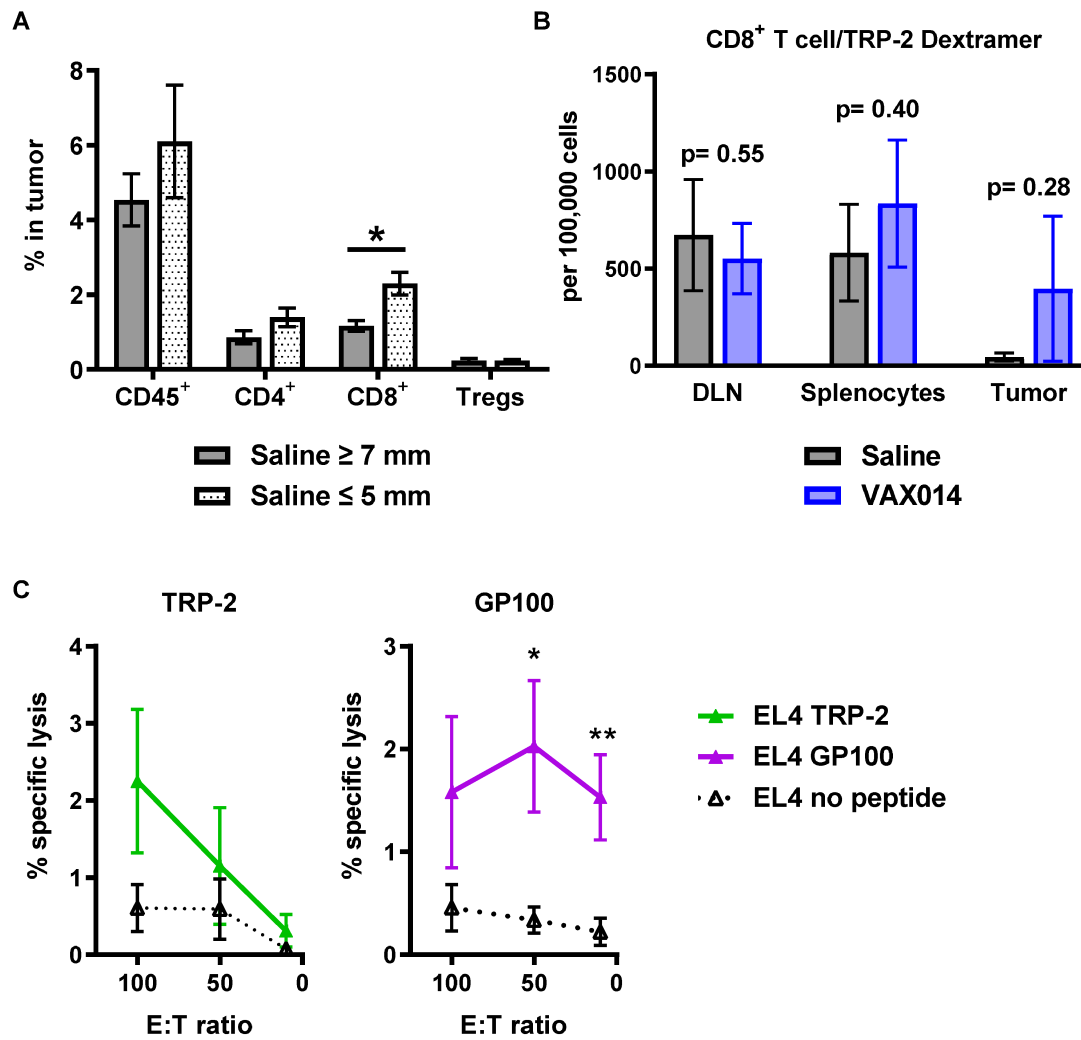

Supplemental Figure S13

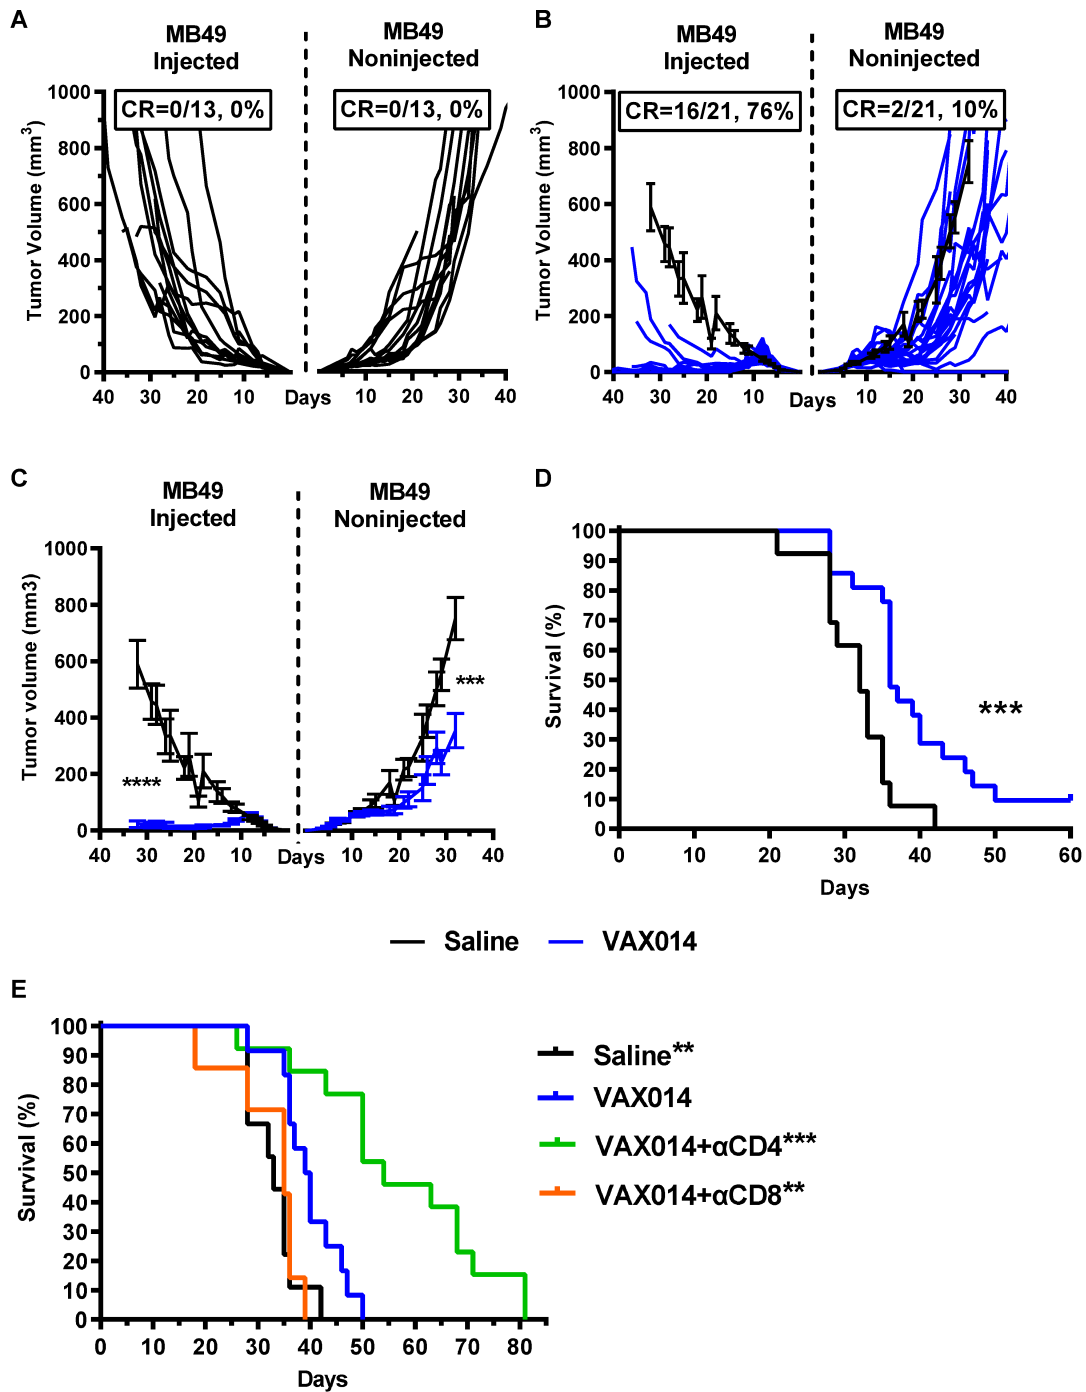

Supplemental Figure S14

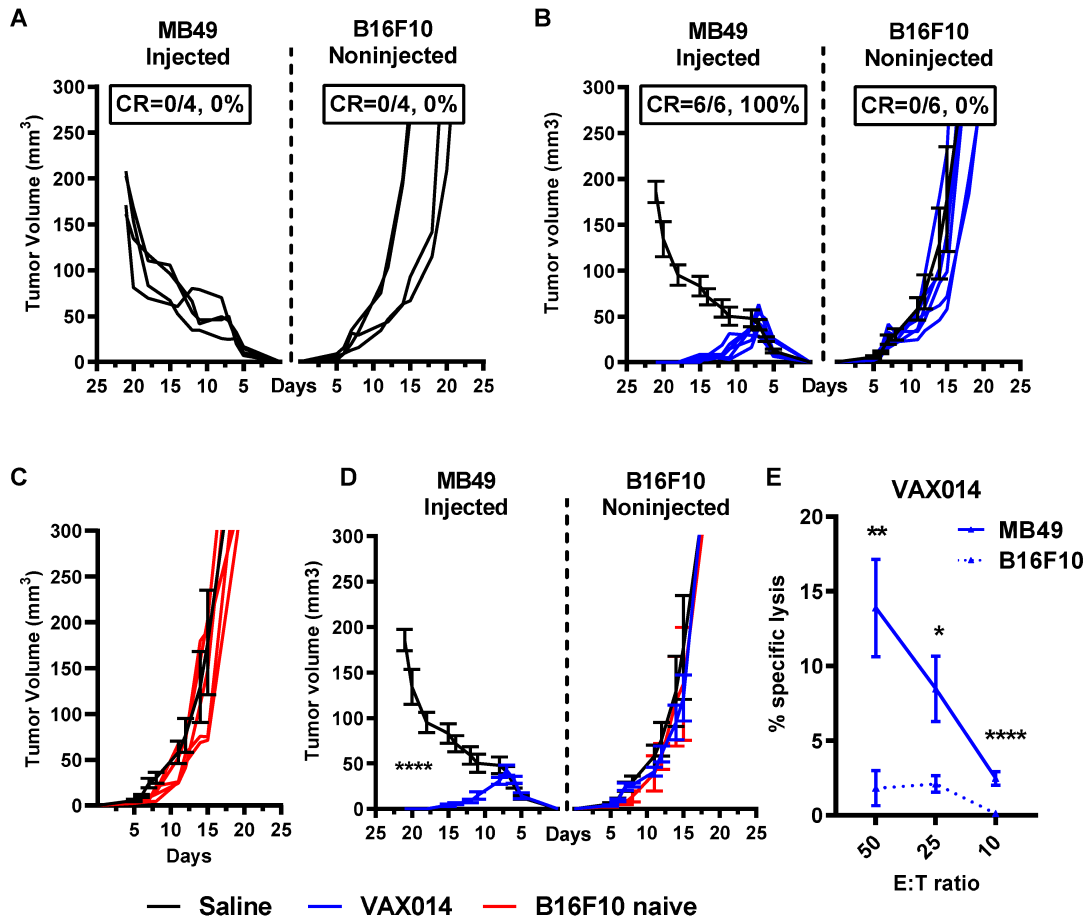

Supplemental Figure S15

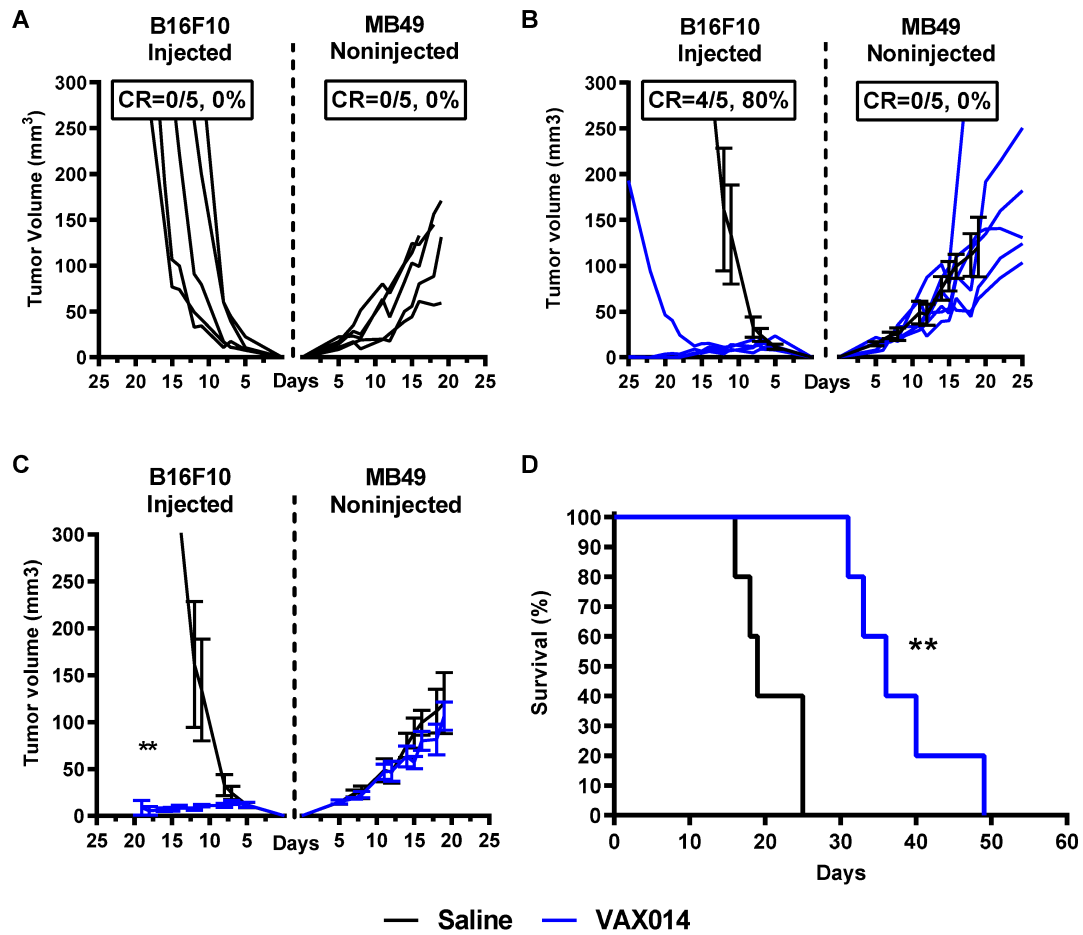

Supplemental Figure S16

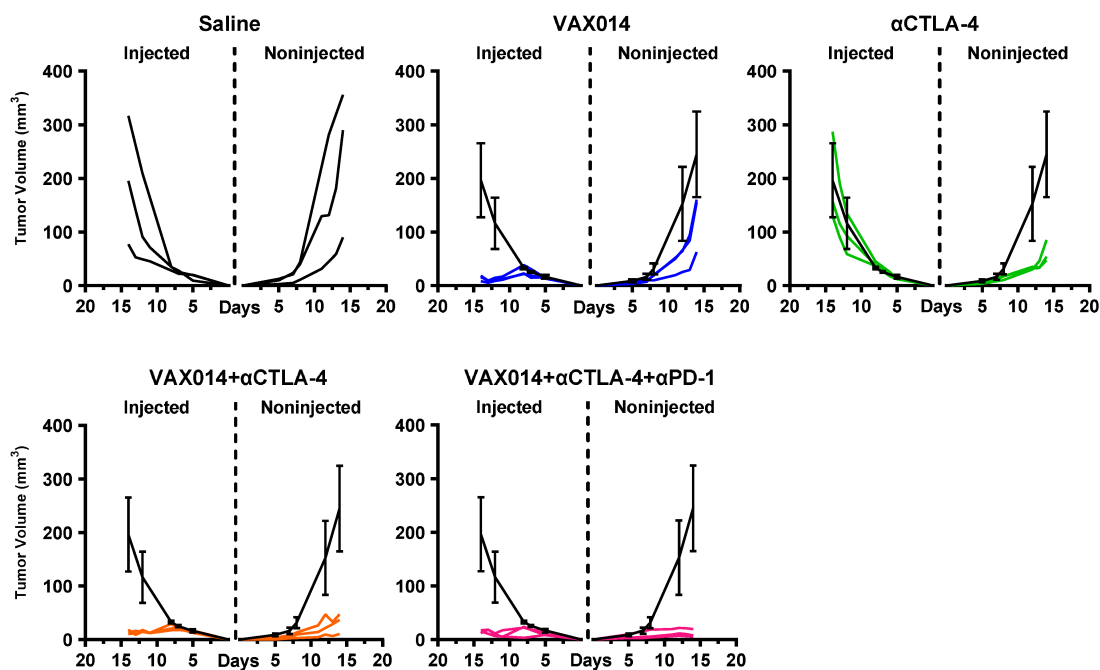



Supplemental Figure S17

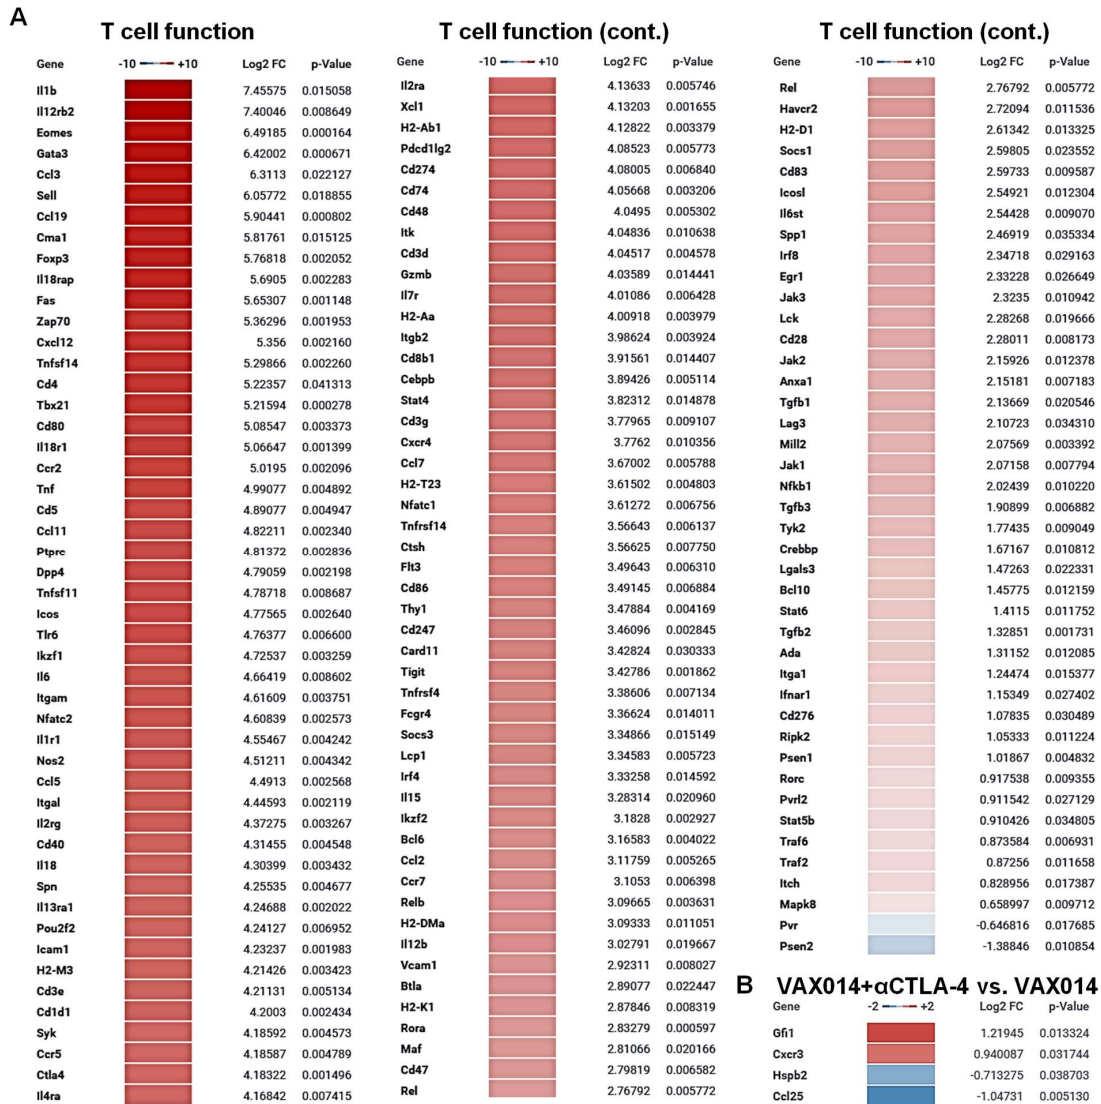

Supplemental Figure S18

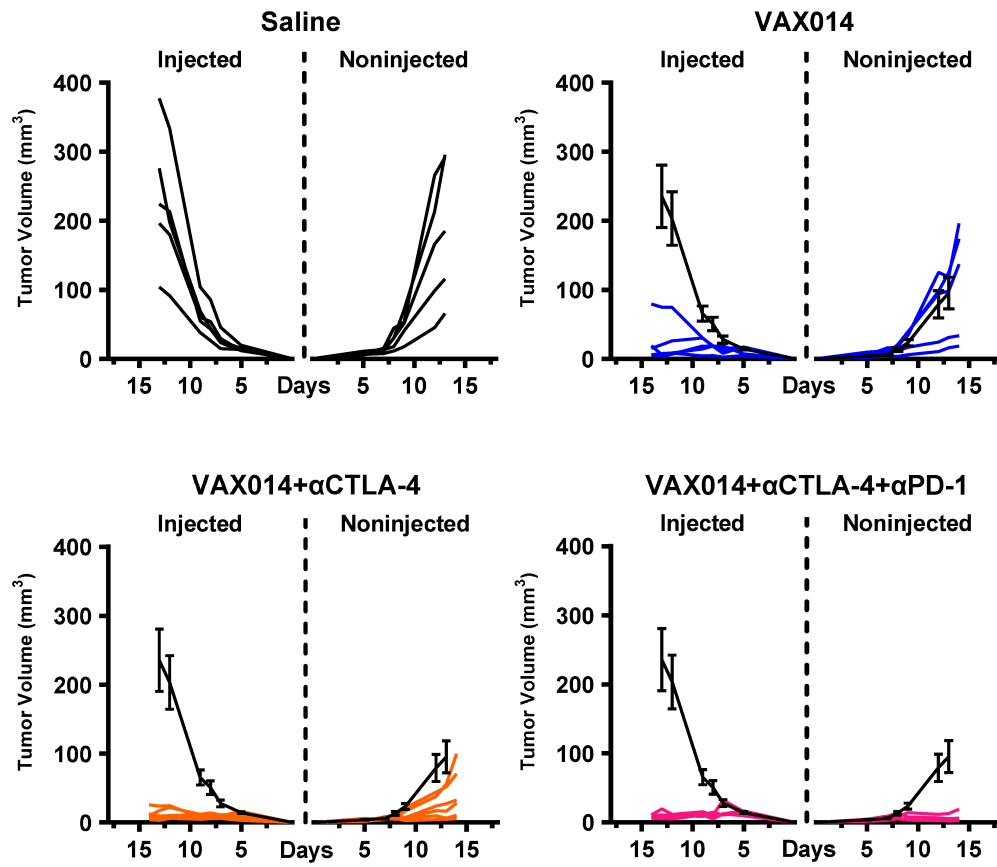

Supplemental Figure S19

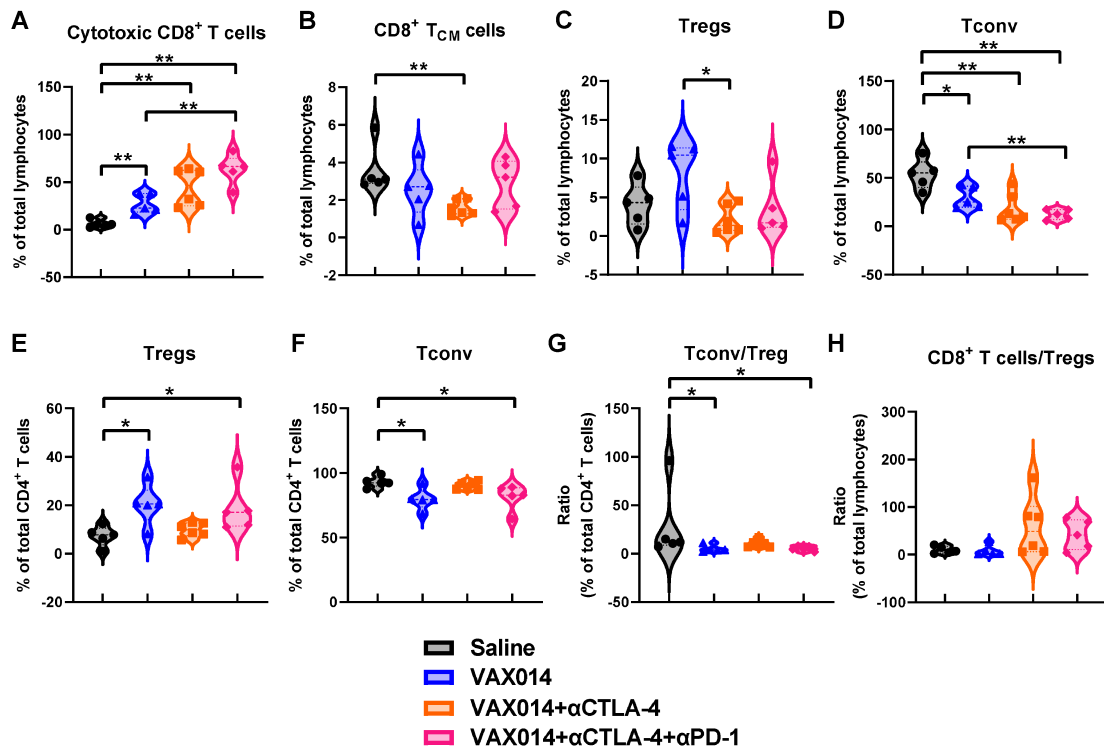

Supplement: jitc-2023-006749supp002.pdf [file jitc-2023-006749supp002.pdf]
