# Supplementary material for: Intralesional administration of VAX014 facilitates in situ immunization and potentiates immune checkpoint blockade in immunologically cold tumors
Source: PubMed Central journal article supplement — J Immunother Cancer. 2023 Jun 8;11(6):e006749. doi: 10.1136/jitc-2023-006749 (PMC10254596; doi:10.1136/jitc-2023-006749), 2023-06-08
Supplement: jitc-2023-006749supp003.pdf [file jitc-2023-006749supp003.pdf]

Supplemental Table S1. Antibodies used in this study

| Antibody                                    | Source              | Clone                         |
|---------------------------------------------|---------------------|-------------------------------|
| <b><i>In vitro</i></b>                      |                     |                               |
| Alexa Fluor® 488 anti-hamster               | Thermo Fisher       | Goat pAb                      |
| Anti-mouse integrin $\alpha 5$              | BD Biosciences      | HM $\alpha 5$ -1, hamster mAb |
| Anti-mouse integrin $\beta 1$               | Thermo Fisher       | HMb1-1, hamster mAb           |
| Hamster isotype control                     | Thermo Fisher       | eBio299Arm, hamster mAb       |
| FITC anti-mouse MHC-I                       | Thermo Fisher       | AF6-88.5.5.3, mouse mAb       |
| FITC mouse IgG2a $\kappa$ isotype           | Thermo Fisher       | eBM2a, mouse mAb              |
| <b><i>In vivo</i></b>                       |                     |                               |
| Anti-mouse CD4                              | Leinco Technologies | GK1.5, rat mAb                |
| Anti-mouse CD8 $\alpha$                     | Leinco Technologies | 2.43, rat mAb                 |
| Anti-mouse NK1.1                            | Leinco Technologies | PK136, mouse mAb              |
| Anti-mouse PD-1                             | Leinco Technologies | RMP1-14, rat mAb              |
| Anti-mouse CTLA-4                           | Leinco Technologies | 9H10, syrian hamster mAb      |
| <b>Single tumor model flow cytometry</b>    |                     |                               |
| APC anti-mouse CD45                         | Biolegend           | 30-F11, rat mAb               |
| APC anti-mouse CD4                          | Biolegend           | RM4-5, rat mAb                |
| FITC anti-mouse FoxP3                       | Thermo Fisher       | FJK-16s, mAb                  |
| FITC anti-mouse CD8 $\alpha$                | Biolegend           | 53-6.7, rat mAb               |
| FITC anti-mouse CD11b                       | Leinco              | M1/70, rat mAb                |
| PE anti-mouse Ly6C                          | Leinco              | HK1.4, rat mAb                |
| PE anti-mouse Ly6G                          | Leinco              | 1A8, rat mAb                  |
| PE anti-mouse CD8 $\alpha$                  | Thermo Fisher       | 53-6.7, rat mAb               |
| FITC TRP-2 dextramer                        | Immudex             | N/A                           |
| FITC rat IgG2b isotype                      | Thermo Fisher       | N/A, rat mAb                  |
| PE rat IgG2a $\kappa$ isotype               | Thermo Fisher       | eBR2a, rat mAb                |
| <b>Bilateral tumor model flow cytometry</b> |                     |                               |
| Brilliant Violet 785™ anti-mouse CD45       | Biolegend           | 30-F11, rat mAb               |
| APC anti-mouse CD3                          | Biolegend           | 17A2, rat mAb                 |
| Brilliant Violet 421™ anti-mouse CD4        | Biolegend           | GK1.5, rat mAb                |
| PE-Cy™7 anti-mouse CD8 $\alpha$             | BD Biosciences      | 53-6.7, rat mAb               |
| PE anti-mouse FoxP3                         | Thermo Fisher       | FJK-16s, rat mAb              |
| FITC anti-mouse Granzyme B                  | Thermo Fisher       | NGZB, rat mAb                 |
| Brilliant Violet 605™ anti-mouse CD62L      | Biolegend           | MEL-14, rat mAb               |
| Brilliant Violet 510™ anti-mouse CD44       | Biolegend           | IM7, rat mAb                  |

pAb: polyclonal antibody, mAb: monoclonal antibody, N/A: no answer
